# Supplementary material
Source: PubMed Central journal article supplement (PMC3389995)
Supplement: NIHMS380818-supplement-1.pdf [file NIHMS380818-supplement-1.pdf]

**Supplementary Table S1.** List of currently available, common HX MS software.

| <b>Software name</b>     | <b>What it does?</b>                                                                                                                                                                                                                                                                                                                         | <b>Refs.</b> |
|--------------------------|----------------------------------------------------------------------------------------------------------------------------------------------------------------------------------------------------------------------------------------------------------------------------------------------------------------------------------------------|--------------|
| HD Desktop               | Derived from “The Deuterator” software by the same group. Integrated platform for both analysis and visualization of HX MS data. Provides efficient and manageable workflow for HX MS data.<br><a href="http://deuterator.florida.scripps.edu/">http://deuterator.florida.scripps.edu/</a>                                                   | [1,2]        |
| HDExaminer               | Commercial solution, supporting various MS data formats including high-resolution MS data.<br><a href="http://www.massspec.com/HDExaminer.html">http://www.massspec.com/HDExaminer.html</a>                                                                                                                                                  | [3-5]        |
| HXExpress                | Semi-automatic data analysis that generates deuterium uptake and peak width plots and improves the speed of analyzing HX MS data.<br><a href="http://www.hxms.com/HXExpress">http://www.hxms.com/HXExpress</a>                                                                                                                               | [6]          |
| Hydra / Mass Spec Studio | Semi-automated software, less processing time for HX MS data. Accommodates MS/MS and supports alternative data collection. Allows for better localization of deuterium after MS/MS fragmentation.<br><a href="https://github.com/dschriem/MassSpecStudio">https://github.com/dschriem/MassSpecStudio</a>                                     | [7]          |
| HeXicon                  | Workflow for automatic deuteration distribution estimation with increased sequence coverage. It allows insight into possible bimodal exchange rather than just average deuteration for each time point.<br><a href="http://hci.iwr.uni-heidelberg.de/MIP/Software/hexicon.php">http://hci.iwr.uni-heidelberg.de/MIP/Software/hexicon.php</a> | [8,9]        |
| DynamX                   | Commercial software with simultaneous visualization of raw MS data, identified peptides, deuterium uptake graphs and comparability plots. Multi-functional user interface. Integrates with ion mobility separation.<br><a href="http://www.waters.com/waters/nav.htm?cid=10168585">http://www.waters.com/waters/nav.htm?cid=10168585</a>     | [10]         |
| HDX Analyzer             | HDX analyzer integrates the graphic visualization and statistical analysis to enable the effective evaluation of hydrogen exchange data. This software analyzes data from a wide range of instruments.<br><a href="http://people.tamu.edu/~syuan/hdxanalyzer/">http://people.tamu.edu/~syuan/hdxanalyzer/</a>                                | [11]         |
| ExMS                     | Processes high-resolution MS data, verifies peptide assignment, extracts deuterium incorporation information. Checkpoints during processing allow for manual intervention in processing routines.<br><a href="http://HX2.med.upenn.edu/download.html">http://HX2.med.upenn.edu/download.html</a>                                             | [12]         |
| HDX Finder               | Web based tool, utilizes mzML and mzXML formatted data files, works with high-resolution data and creates multiple graphical outputs.<br><a href="https://hdxanalyzer.kumc.edu/">https://hdxanalyzer.kumc.edu/</a>                                                                                                                           | [13]         |
| MS Tools                 | Web based application for visualization and presentation of HX MS data.<br><a href="http://ms.biomed.cas.cz/MSTools/">http://ms.biomed.cas.cz/MSTools/</a> ; USA Mirror: <a href="http://www.hxms.com/mstools/">http://www.hxms.com/mstools/</a>                                                                                             | [14]         |
| AUTOHD                   | Computer program that takes in a list of mass spectra, defines isotopic clusters and identifies them using a list of candidates peptides generated from enzymatic fragmentation or dissociation.<br><a href="http://www.ms-utils.org/autohd.html">http://www.ms-utils.org/autohd.html</a>                                                    | [15]         |

## References:

1. Pascal, B. D.; Chalmers, M. J.; Busby, S. A.; Griffin, P. R.: HD desktop: an integrated platform for the analysis and visualization of H/D exchange data. *J Am Soc Mass Spectrom* **20**, 601-610 (2009)
2. Pascal, B. D.; Chalmers, M. J.; Busby, S. A.; Mader, C. C.; Southern, M. R.; Tsinoremas, N. F.; Griffin, P. R.: The Deuterator: software for the determination of backbone amide deuterium levels from H/D exchange MS data. *BMC Bioinformatics* **8**, 156 (2007)
3. Hamuro, Y.; Coales, S. J.; Morrow, J. A.; Molnar, K. S.; Tuske, S. J.; Southern, M. R.; Griffin, P. R.: Hydrogen/deuterium-exchange (H/D-Ex) of PPARgamma LBD in the presence of various modulators. *Protein Sci* **15**, 1883-1892 (2006)
4. Hamuro, Y.; Coales, S. J.; Southern, M. R.; Nemeth-Cawley, J. F.; Stranz, D. D.; Griffin, P. R.: Rapid analysis of protein structure and dynamics by hydrogen/deuterium exchange mass spectrometry. *J Biomol Tech* **14**, 171-182 (2003)
5. Horn, J. R.; Kraybill, B.; Petro, E. J.; Coales, S. J.; Morrow, J. A.; Hamuro, Y.; Kossiakoff, A. A.: The role of protein dynamics in increasing binding affinity for an engineered protein-protein interaction established by H/D exchange mass spectrometry. *Biochemistry* **45**, 8488-8498 (2006)
6. Weis, D. D.; Engen, J. R.; Kass, I. J.: Semi-automated data processing of hydrogen exchange mass spectra using HX-Express. *J Am Soc Mass Spectrom* **17**, 1700-1703 (2006)
7. Slys, G. W.; Baker, C. A.; Bozsa, B. M.; Dang, A.; Percy, A. J.; Bennett, M.; Schriemer, D. C.: Hydra: software for tailored processing of H/D exchange data from MS or tandem MS analyses. *BMC Bioinformatics* **10**, 162 (2009)
8. Kreshuk, A.; Stankiewicz, M.; Lou, X. H.; Kirchner, M.; Hamprecht, F. A.; Mayer, M. P.: Automated detection and analysis of bimodal isotope peak distributions in H/D exchange mass spectrometry using HeXicon. *Int J Mass Spectrom* **302**, 125-131 (2011)
9. Lou, X.; Kirchner, M.; Renard, B. Y.; Kothe, U.; Boppel, S.; Graf, C.; Lee, C. T.; Steen, J. A.; Steen, H.; Mayer, M. P.; Hamprecht, F. A.: Deuteration distribution estimation with improved sequence coverage for HX/MS experiments. *Bioinformatics* **26**, 1535-1541 (2010)
10. Wei, H.; Ahn, J.; Yu, Y. Q.; Tymiak, A.; Engen, J. R.; Chen, G.: Using Hydrogen/Deuterium Exchange Mass Spectrometry to Study Conformational Changes in Granulocyte Colony Stimulating Factor upon PEGylation. *J Am Soc Mass Spectrom* **23**, 498-504 (2012)
11. Liu, S.; Liu, L.; Uzuner, U.; Zhou, X.; Gu, M.; Shi, W.; Zhang, Y.; Dai, S. Y.; Yuan, J. S.: HDX-analyzer: a novel package for statistical analysis of protein structure dynamics. *BMC Bioinformatics* **12 Suppl 1**, S43 (2011)
12. Kan, Z. Y.; Mayne, L.; Chetty, P. S.; Englander, S. W.: ExMS: data analysis for HX-MS experiments. *J Am Soc Mass Spectrom* **22**, 1906-1915 (2011)
13. Miller, D. E.; Prasanna, C. B.; Villar, M. T.; Fenton, A. W.; Artigues, A.: HDXFinder: Automated Analysis and Data Reporting of Deuterium/Hydrogen Exchange Mass Spectrometry. *J Am Soc Mass Spectrom* **23**, 425-429 (2012)
14. Kavan, D.; Man, P.: MSTools-Web based application for visualization and presentation of HXMS data. *Int J Mass Spectrom* **302**, 53-58 (2011)
15. Palmblad, M.; Buijs, J.; Hakansson, P.: Automatic analysis of hydrogen/deuterium exchange mass spectra of peptides and proteins using calculations of isotopic distributions. *J Am Soc Mass Spectrom* **12**, 1153-1162 (2001)
